# Supplementary material
Source: Springer Nature journal article supplement (https://www.springermedizin.de/resource/supplementary/12889_2012_4796_MOESM2_ESM.pdf/9493226)
Supplement: MOESM2 [file 9493226]

All cases with Ontario Public Health Laboratory confirmed *Salmonella* Enteritidis (SE) (n=630)

Cases excluded prior to interview

Exclusions (n=36):

- Reside out of Province (6)
- Specimen other than stool sample (30)

Laboratory confirmed SE cases isolated from stool sample eligible for interview (n=594)

Loss to Follow-up and Refusals (n=87):

- No telephone number or unreachable after 5 attempts (72)
- Refusals (15)

Cases excluded following interview

Exclusions (n=308):

- Travelled outside US or Canada in 3 days prior to symptom onset (260)\*
- Possible secondary case (53)\* – 4 of which were non-index cases part of known outbreaks
- Delayed (6) or repeated testing (1)
- Undefined symptom onset or asymptomatic (12)
- Non-English speaker (2)

SE cases included in analysis (n=199) 73 PT8, 50 PT13a, 76 nonPT8/nonPT13a
